# Supplementary material
Source: publisher site journal article supplement (https://www.dovepress.com/article/273008)

Supplementary Figure 1 Characterization of CRC cells derived exosomes  
(A) Electron microscopy (x100 and x200);  
(B) Particle-size distribution;  
(C) Western blot analysis for exosome markers CD9 and CD63

**A**

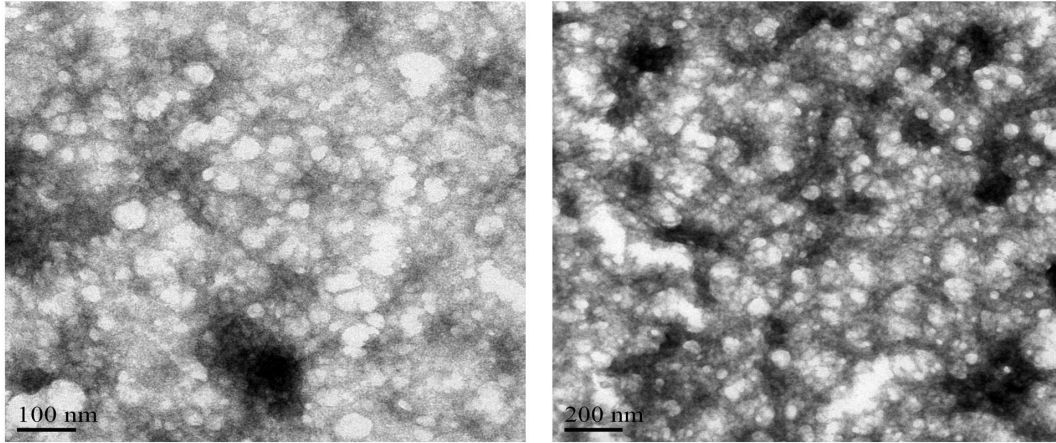

**B**

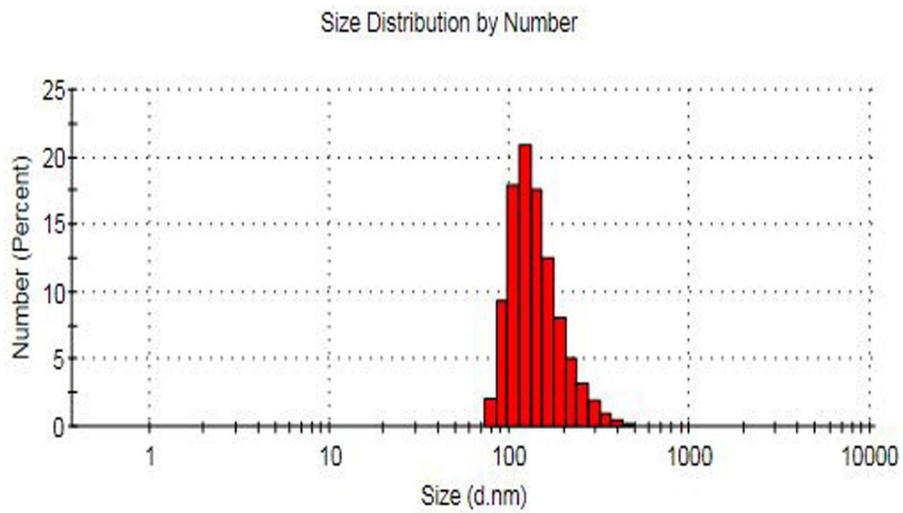

**C**

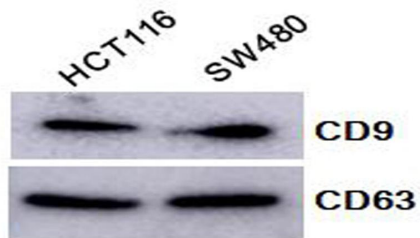

Supplement: Supplementary file 1 [file get_supplementary_file.php]
